# Supplementary material
Source: HighWire-hosted journal article supplement (https://www.cmajopen.ca/highwire/filestream/81387/field_highwire_adjunct_files/0/2019-0100-1-at.pdf)
Supplement: 2019-0100-1-at.pdf [file 2019-0100-1-at.pdf]

## **Appendix 1 (as supplied by the authors): Semi-Structured Interview Guide**

### **Residents/Patients**

1. What kinds of experiences have you had with the Advance Care Planning process?
2. What are your feelings about doctors and nurses asking people to participate in this process?
3. Have you participated in Advance Care Planning by either thinking about, talking about or writing down your wishes for future care? What did you do?
4. How likely do you think it is that your family or someone else will need to make a treatment decision for you down the road because you are unable to make the decision for yourself?
5. What kind of planning do you think you should do to prepare for the possibility of developing a serious illness?
6. What would you hope to achieve if you were to begin Advance Care Planning, either now or in the future?
7. How ready (emotionally, mentally?) do you feel to have these conversations? How did you come to feel ready? OR IF NOT READY: What do you think might make you feel ready?
8. Have you thought about/talked about/documented your treatment options, just in case there is a change in your health? How did thinking/talking/documenting about this make you feel? Is there something that makes this process difficult for you? Is there something that makes this process easier for you?
9. Have you talked to a doctor or nurse about your preferences for healthcare just in case your health worsens? With whom did you speak? How did you feel while having these discussions? Is there something that makes talking to doctors or nurses about your wishes easier/more difficult for you?
10. Do you have a personal directive? (IF YES) What motivates you to have one? (IF NO) how would you feel about having one?
11. Is ACP something you would recommend to other people? Why or why not?

### **Clinicians**

1. What does ACP mean to you?
2. How do patients in this clinic come to have conversations regarding ACP and their wishes?
3. How do you know when a patient is ready to have these conversations?
4. What do you think about the healthcare system asking people to participate in ACP?
5. Please describe how you see your role in the Advance Care Planning process.
6. What is your opinion on how these conversation go overall?
7. How comfortable are you initiating or revisiting discussions regarding ACP with patients and their families?
8. What patient and family factors facilitate or hinder you in initiating this discussion? (language, age, length of your relationship, culture of patient)
9. Would you please share your thoughts on how you think the healthcare system is currently set up to facilitate end-of-life discussions between clinicians and patients/families.
